# Supplementary material
Source: publisher figshare collection journal article supplement (https://karger.figshare.com/ndownloader/files/28882566)
Supplement: Supplementary file 1 [file 28882566]

**Supplementary material**

**Methods**

All patients were evaluated during the previous diagnostic workup with Skin Prick tests (SPTs) performed on the volar surface of the forearm using a standard 1-mm tip lancet, according to the recommendations of the European Academy of Allergy and Clinical Immunology [S1,S2]. The positive and negative controls for the skin prick test were obtained using histamine (10 mg/mL; Lofarma, Milan, Italy) and normal saline respectively. Results were read after 15 min. and were considered positive if the largest allergen-induced wheal diameter was ≥3 mm. The standard SPT panel performed consisted of common airway allergens (mites, grass, weed, birch, hazel, olive and cypress pollens, molds, and animal epithelia) and common food allergens (milk, egg, wheat, cod, tomato, soy, peanut) (Lofarma, Milan, Italy). Profilin extract and a commercial peach extract enriched with Pru p 3 (with a declared 30 mcg/ml concentration), both produced by ALK-Abellò, Madrid, Spain, were used as well [S3]. Finally, most of the patients were also evaluated with skin Prick-by-Prick (PbP) tests with the suspected culprit raw fruit.

In patients with positive SPT results with Pru p 3-enriched peach peel extract, serum specific Immunoglobulin E (sIgE) levels of anti-peach and of anti-Pru p 1, 3, 4 were determined using the ImmunoCAP system (Thermo Fisher Scientific, Uppsala, Sweden), according to the manufacturer’s instructions with a positive cut-off point set at 0.1 kUA/L.

**References of Supplementary**

1. Dreborg S, Backman A, Basomba A, Bousquet J, Dieges P, Malling HJ. Skin tests used in type I allergy testing. Position paper. Allergy: European Journal of Allergy and Clinical Immunology, Supplement. 1989.
2. Heinzerling L, Mari A, Bergmann KC, Bresciani M, Burbach G, Darsow U, et al. The skin prick test - European standards. Clin Transl Allergy. 2013;3(1):1–10.
3. Goikoetxea MJ, Berroa F, Cabrera-Freitag P, Ferrer M, Núñez-Córdoba JM, Sanz ML, et al. Do skin prick test and in vitro techniques diagnose sensitization to peach lipid transfer protein and profilin equally well in allergy to plant food and pollen? J Investig Allergol Clin Immunol. 2015;25(4):283–7.
